# Supplementary material for: Non-stabilized europium-doped lanthanum oxyfluoride and fluoride nanoparticles well dispersed in thin silica films
Source: Royal Society of Chemistry journal article supplement (doi:10.1039/c2jm34901a), 2012-01-01
Supplement: c2jm34901a.pdf [file c2jm34901a.pdf]

## Supplementary Information (SI)

### Non-stabilized europium-doped lanthanum oxyfluoride and fluoride nanoparticles well dispersed in thin silica films

Emille M. Rodrigues, Ernesto R. Souza, Jorge H. S. K. Monteiro, Rafael D. L. Gaspar, Italo O. Mazali, Fernando A. Sigoli.

Laboratory of Functional Materials – Institute of Chemistry – University of Campinas – UNICAMP

**Table 1SI.** Polar spherical coordinates for LaOF:Eu<sup>3+</sup> (rhombohedral phase).

| Bond   | R / Å  | $\theta / ^\circ$ | $\Phi / ^\circ$ |
|--------|--------|-------------------|-----------------|
| Eu – F | 2.4240 | 90.0000           | 180.0000        |
| Eu – F | 2.4188 | 90.0000           | 104.8521        |
| Eu – F | 2.4195 | 146.8198          | 242.0802        |
| Eu – F | 2.4190 | 33.1627           | 242.0600        |
| Eu – O | 2.5860 | 90.0000           | 0.0000          |
| Eu – O | 2.5866 | 38.4752           | 46.6366         |
| Eu – O | 2.5869 | 90.0000           | 295.2872        |
| Eu – O | 2.5862 | 141.5374          | 46.6121         |

**Table 2SI.** Polar spherical coordinates for LaOF:Eu<sup>3+</sup> (tetragonal phase).

| Bond   | R / Å  | $\theta / ^\circ$ | $\Phi / ^\circ$ |
|--------|--------|-------------------|-----------------|
| Eu – F | 2.4214 | 32.4192           | 128.4944        |
| Eu – F | 2.4231 | 90.0000           | 70.9220         |
| Eu – F | 2.4226 | 90.0000           | 186.0660        |
| Eu – F | 2.4231 | 147.6062          | 128.4944        |
| Eu – O | 2.6140 | 90.0000           | 70.7669         |
| Eu – O | 2.6136 | 141.5209          | 173.9508        |
| Eu – O | 2.6128 | 90.0000           | 122.3275        |
| Eu – O | 2.6136 | 38.4791           | 122.3275        |

**Table 3SI.** Polar spherical coordinates for LaF<sub>3</sub> (hexagonal phase).

| Bond   | R / Å  | $\theta / ^\circ$ | $\Phi / ^\circ$ |
|--------|--------|-------------------|-----------------|
| Eu – F | 2.6060 | 90.0000           | 0.0000          |
| Eu – F | 2.4201 | 90.0000           | 67.7589         |
| Eu – F | 2.4529 | 118.3565          | 190.1125        |
| Eu – F | 2.6060 | 34.6037           | 28.1408         |
| Eu – F | 2.4202 | 63.4174           | 299.3246        |
| Eu – F | 2.4742 | 76.5378           | 133.0970        |
| Eu – F | 2.4701 | 28.3435           | 202.3004        |
| Eu – F | 2.4711 | 150.5587          | 21.8978         |

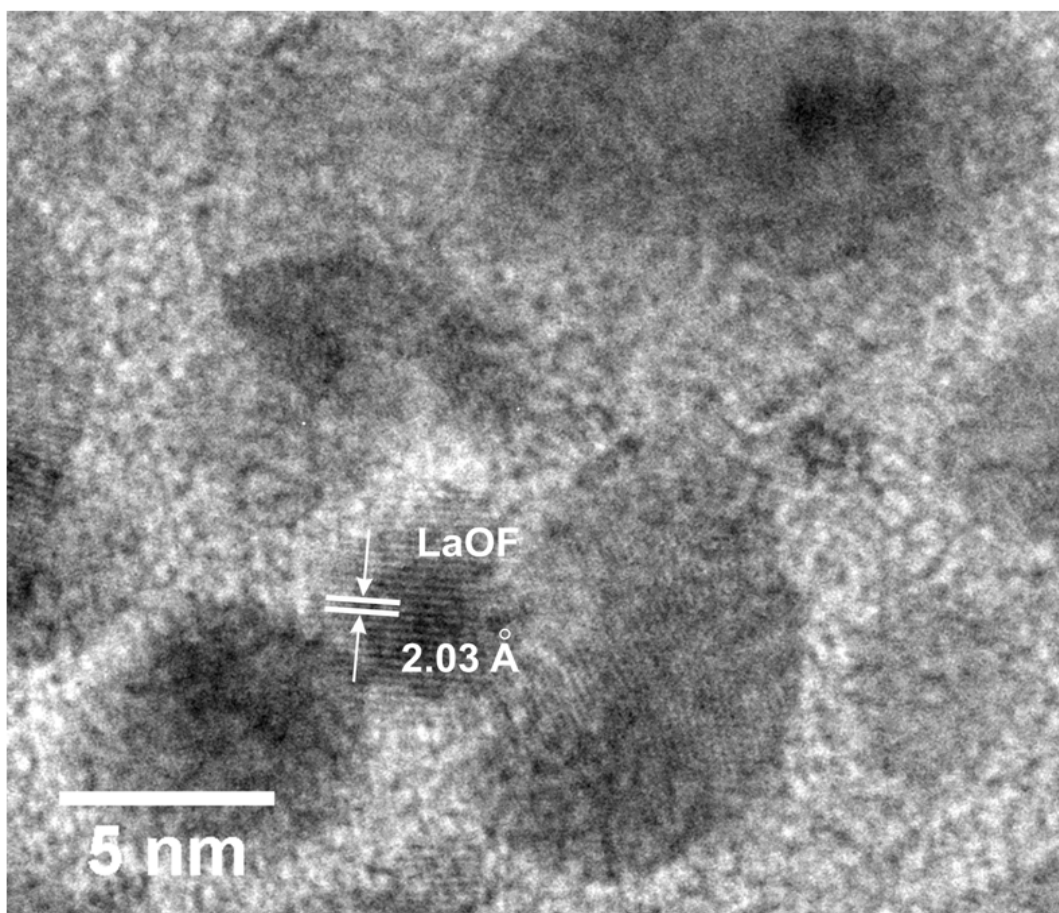

**Figure 1SI:** Transmission electron microscopy of the nanoparticle containing -non densified thin silica film (650 °C 5 min).

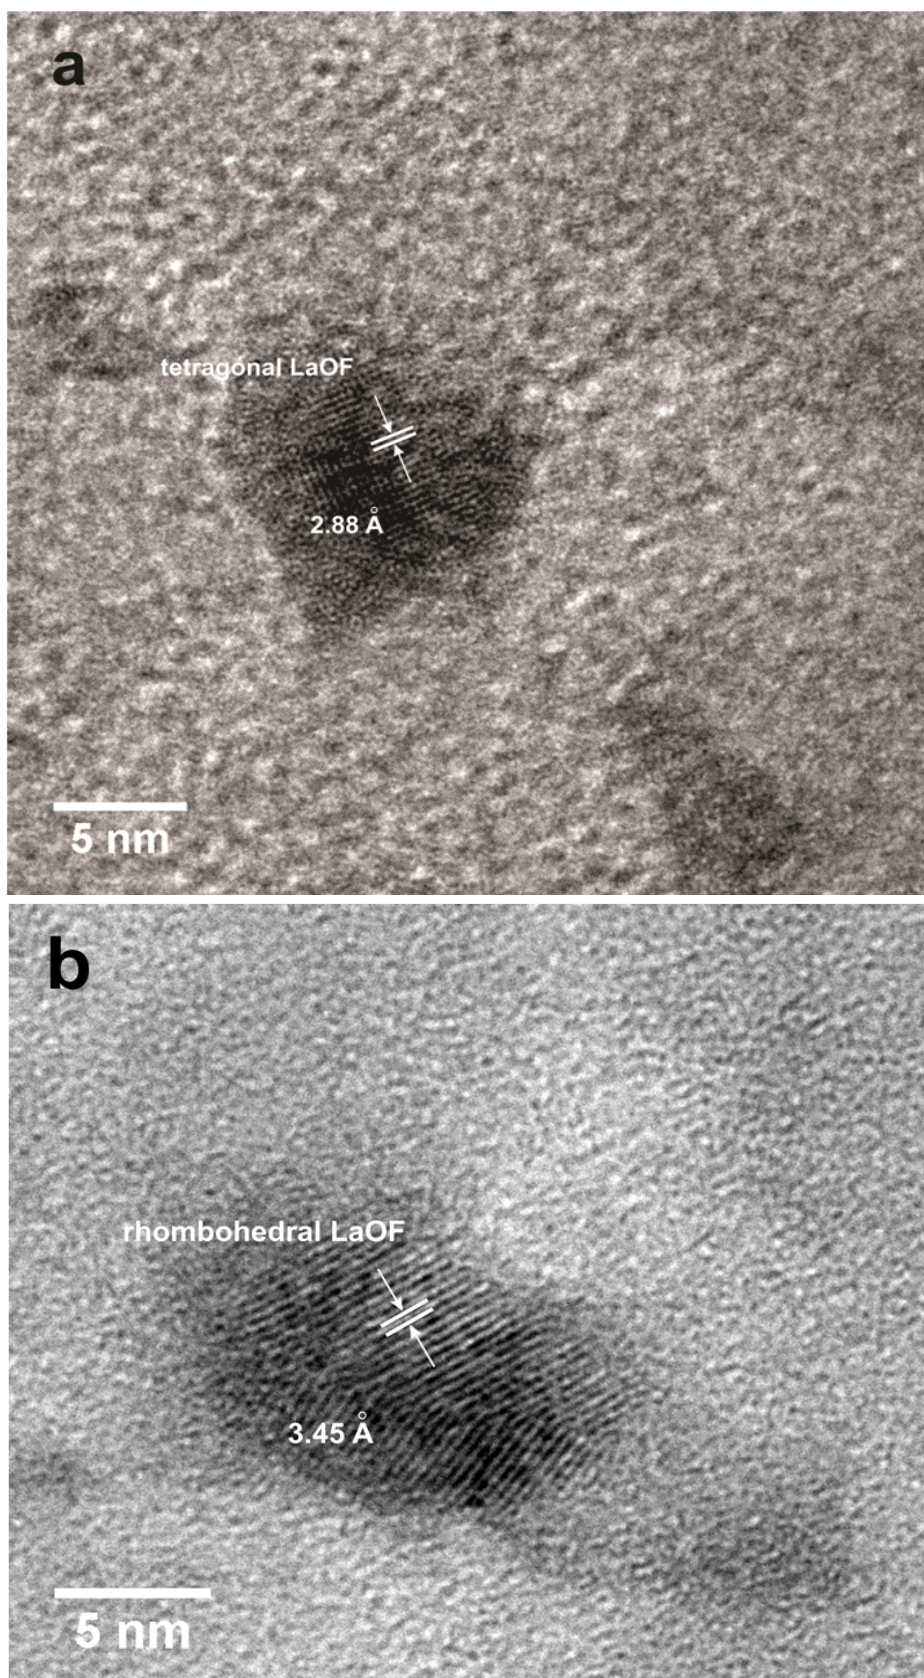

**Figure 2SI:** Transmission electron microscopy of the nanoparticles containing densified thin silica film (1150 °C 2 min). (a) tetragonal LaOF. (b) rhombohedral LaOF.
